# Supplementary material
Source: ML conference proceedings conference paper supplement (https://proceedings.mlr.press/v139/alieva21a.html)
Supplement: Supplementary file [file alieva21a-supp.pdf]

## A. Missing Proofs from Section 3

Before proving Lemma 4, we first need the following Lemma that bounds the probability of a single arm being misordered when deciding which arms to remove in a round:

**Lemma 3.** *Assume that the best arm was not eliminated prior to round  $m$ . Let  $[x]_+ = \max(x, 0)$ . Then for any arm  $x_i \in S_m$ ,*

$$\mathbb{P}[\langle \hat{\theta}_m, x_i \rangle > \langle \hat{\theta}_m, x_1 \rangle] \leq \exp\left(-\frac{[\Delta_i - (2 + 2\sqrt{2h_{|S_m|/4}})\gamma_{\max}]_+^2 T}{16 \log_2(n) h_{|S_m|/4} \sigma^2}\right)$$

*Proof.* For simplicity, we will drop all subscripts  $m$  in this proof, so that we say  $\hat{\theta}$  instead of  $\hat{\theta}_m$  and  $\mathcal{Z}$  instead of  $\mathcal{Z}_m$  etc. By slight abuse of notation, let  $y \in \mathbb{R}^N$  be the vector of true rewards for the sampled arms  $\mathcal{Z}$ , let  $\gamma \in \mathbb{R}^N$  be the misspecification vector, and let  $X \in \mathbb{R}^{N \times d}$  be the design matrix whose rows are the elements of  $\mathcal{Z}$ . That is, we have  $y = X\theta + \gamma$ . Let  $s = \hat{y} - y$ , all of whose components are independent 1-subgaussian random variables

Fix some index  $i$ . Notice that if  $i$  does not satisfy  $\Delta_i > (2 + 2\sqrt{2h_{S_m}})|\gamma_{\max}|$ , then the statement is trivially true. Therefore, we may safely assume  $\Delta_i > (2 + 2\sqrt{2h_{S_m}})|\gamma_{\max}|$

Let  $\theta' = \operatorname{argmin}_{X\theta = X\theta'} \|\theta'\|_2$ . Notice that  $y = X\theta + \gamma = X\theta' + \gamma$  implies that using  $\theta'$  does not introduce more misspecification. (In fact,  $\theta = \theta'$  if  $X$  has rank  $d$ .) Further, by Lemma 10, we have that  $x_i - x_j$  is in the span of  $\mathcal{Z}$  for all  $x_i$  and  $x_j$  in  $S_m$ , so that  $\langle \theta', x_i - x_j \rangle = \langle \theta, x_i - x_j \rangle$  for all  $i$  and  $j$ .

Then, after the player obtains the vector of rewards  $\hat{y}$  by playing each arm in  $\mathcal{Z}$ , the estimate  $\hat{\theta}$  is given by:

$$\begin{aligned} \hat{\theta} &= \operatorname{argmin}_{\theta \in \operatorname{span}(\mathcal{Z})} \sum_{x_i \in \hat{\mathcal{Z}}} (\langle \theta, x_i \rangle - \hat{y}_i)^2 \\ &= \operatorname{argmin}\{\|\hat{\theta}\|_2 \text{ s.t. } X^T X \hat{\theta} = X^T \hat{y}\} \end{aligned}$$

Now, since for any  $v$  there exists  $u$  such that  $X^T X u = X^T v$ , we have:

$$\begin{aligned} \hat{\theta} &= (X^T X)^\dagger X^T \hat{y} = (X^T X)^\dagger X^T (X\theta + s + \gamma) \\ &= \theta' + (X^T X)^\dagger X^T (s + \gamma) \end{aligned}$$

This implies:

$$\begin{aligned} \langle \hat{\theta}, x_i \rangle &> \langle \hat{\theta}, x_1 \rangle \\ \langle \hat{\theta}, x_i - x_1 \rangle - y_i + y_1 &\geq \Delta_i \\ \langle \hat{\theta} - \theta', x_i - x_1 \rangle &> \Delta_i - \gamma_1 + \gamma_i \\ &\geq \Delta_i - 2\gamma_{\max} \end{aligned}$$

Substituting in our expression for  $\hat{\theta}$ , we have that the probability that the empirical average of the best arm is smaller than the empirical average of arm  $i$  is at most

$$\mathbb{P}[(x_i - x_1)^T (X^T X)^\dagger X^T (s + \gamma) > \Delta_i - 2\gamma_{\max}]$$

Next, we will need some guarantee about the quality of the set  $\mathcal{Z}$ . By Theorem 5, `GetArms` returns  $\mathcal{Z}$  that satisfies  $|\mathcal{Z}| = N$  and

$$\sup_{x_i - x_j \in S_m} (x_j - x_i)^T \left( \sum_{z \in \mathcal{Z}} z z^T \right)^\dagger (x_j - x_i) \leq 8 \frac{h_{|S_m|/4}}{N} \quad (3)$$

Using this fact, we apply Cauchy-Schwarz to obtain:

$$\begin{aligned}
 |(x_i - x_1)^T (X^T X)^\dagger X^T \gamma| &\leq \|X(X^T X)^\dagger(x_i - x_1)\|_2 \|\gamma\|_2 \\
 &\leq \sqrt{N} \|\gamma\|_\infty \sqrt{\sup_{x_i, x_j \in S_m} (x_j - x_i)^T (X^T X)^\dagger (x_j - x_i)} \\
 &= \sqrt{N} \|\gamma\|_\infty \sqrt{\sup_{x_i, x_j \in S_m} (x_j - x_i)^T \left( \sum_{z \in \hat{Z}} z z^T \right)^\dagger (x_j - x_i)} \\
 &\leq \sqrt{N} \sqrt{\frac{8h_{|S_m|/4}}{N}} \|\gamma\|_\infty \leq \sqrt{8h_{|S_m|/4}} \gamma_{\max}
 \end{aligned}$$

Thus,

$$\begin{aligned}
 &\mathbb{P}[(x_i - x_1)^T (X^T X)^\dagger X^T (s + \gamma) > \Delta_i - 2\gamma_{\max}] \leq \\
 &\mathbb{P}\left[(x_i - x_1)^T (X^T X)^\dagger X^T s > \Delta_i - \left(2 + \sqrt{8h_{|S_m|/4}}\right) \gamma_{\max}\right]
 \end{aligned}$$

Then, since  $s$  is a mean zero,  $\sigma$ -subgaussian vector, for any  $v \in \mathbb{R}^N$ ,  $\langle v, s \rangle$  is a mean 0,  $\|v\|_2 \sigma$ -subgaussian random variable. Applying the Hoeffding bound, for any  $\epsilon > 0$ ,

$$\mathbb{P}[\langle v, s \rangle > \epsilon] \leq \exp\left(-\frac{\epsilon^2}{2\|v\|_2^2 \sigma^2}\right)$$

We will substitute  $X(X^T X)^\dagger(x_i - x_1)$  for  $v$  in the above formulation of Hoeffding's bound. To start, we compute the norm:

$$\begin{aligned}
 \|X(X^T X)^\dagger(x_i - x_1)\|_2^2 &= (x_i - x_1)^T (X^T X)^\dagger (x_i - x_1) \\
 &\leq \sup_{x_i, x_j \in Z} (x_j - x_i)^T \left( \sum_{z \in \hat{Z}} z z^T \right)^\dagger (x_j - x_i) \leq 8 \frac{h_{|S_m|/4}}{N}
 \end{aligned}$$

Then substituting  $N = \frac{T}{\log_2 n}$ , and combining the above, we get that

$$\begin{aligned}
 &\mathbb{P}[(x_i - x_1)^T (X^T X)^\dagger X^T (s + \gamma) \geq \Delta_i - 2\gamma_{\max}] \leq \\
 &\exp\left(-\frac{(\Delta_i - (2 + 2\sqrt{2h_{|S_m|/4}})\gamma_{\max})^2 T}{16 \log_2(n) h_{|S_m|/4} \sigma^2}\right)
 \end{aligned}$$

□

Next, following (Karnin et al., 2013), we provide the missing proof of Lemma 4:

**Lemma 4.** *Assume that the best arm was not eliminated prior to round  $m$ , and let  $[x]_+ = \max(0, x)$ . Then the probability that the best arm is eliminated on round  $m$  is at most*

$$3 \exp\left(-\frac{\left[\Delta_{\frac{1}{4}|S_m|} - (2 + 2\sqrt{2h_{\frac{1}{4}|S_m|}})\gamma_{\max}\right]_+^2 T}{16 \log_2(n) h_{|S_m|/4} \sigma^2}\right)$$

*Proof.* If the best arm is thrown out at round  $m$ , there are at least  $\frac{1}{2}|S_m|$  arms in  $S_m$  whose  $\hat{y}$  estimates are higher than that of the best arm. Let  $S'_m \subset S_m$  be the set of arms that excludes the  $\frac{1}{4}|S_m|$  arms with the largest true means in  $S_m$ . If the best arm is thrown out, then at least  $\frac{1}{3}$  of arms in  $S'_m$  must have higher  $\hat{y}$  estimates than that of the best arm. Let  $N_m$  be the

number of such arms. Define  $D = \max\{(\Delta_{\frac{1}{4}|S_m|} - (2 + 2\sqrt{2h_{|S_m|/4}})\gamma_{\max})^2, 0\}$ . Then using Lemma 3, the expected number of such arms is at most

$$\begin{aligned}\mathbb{E}[N_m] &= \sum_{x_i \in S'_m} \mathbb{P}[\langle \hat{\theta}, x_i \rangle \geq \langle \hat{\theta}, x_1 \rangle] \\ &\leq |S'_m| \exp\left(-\frac{DT}{16 \log_2(n) h_{|S_m|/4} \sigma^2}\right)\end{aligned}$$

Then, by Markov inequality, the probability of the best arm being thrown out at round  $m$  is at most

$$\mathbb{P}\left[N_m > \frac{1}{3}|S'_m|\right] \leq \frac{\mathbb{E}[N_m]}{\frac{1}{3}|S'_m|} \leq 3 \exp\left(-\frac{DT}{16 \log_2(n) h_{|S_m|/4} \sigma^2}\right)$$

□

## B. Missing Proofs from Section 4

Before proving Theorem 5, we need the following Lemmas, which characterize the quality of the candidate set of arms returned by the method of (Allen-Zhu et al., 2017).

First, we have the following easy technical Lemma:

**Lemma 10.** *If for some sets  $S$  and  $\mathcal{Z}$*

$$\sup_{x_i - x_j \in S} (x_j - x_i)^T \left( \sum_{z \in \mathcal{Z}} z z^T \right)^\dagger (x_j - x_i) < \infty$$

then  $S \subset \text{span}(\mathcal{Z})$ .

*Proof.* Fix any  $x = x_i - x_j \neq 0, x_i, x_j \in S$ . Then, since

$$x^T \left( \sum_{z \in \mathcal{Z}} z z^T \right)^\dagger x < \infty$$

there exists  $y$  s.t.

$$\left( \sum_{z \in \mathcal{Z}} z z^T \right) y = \sum_{z \in \mathcal{Z}} z (z^T y) = x$$

which implies that  $x \in \text{span}(\mathcal{Z})$ . □

**Lemma 11.** *Given the set  $S \subset \mathcal{A} \subset \mathbb{R}^d$  the objective  $f_S$  above, and a number  $N \geq d$  the output  $\hat{\mathcal{Z}}$  of  $\text{OptDesign}$  satisfies  $\hat{\mathcal{Z}} \subset \mathcal{A}, |\hat{\mathcal{Z}}| \leq N$  and  $\sup_{x_i, x_j \in S} (x_j - x_i)^T \left( \sum_{z \in \hat{\mathcal{Z}}} z z^T \right)^\dagger (x_j - x_i) \leq \frac{14}{N} \inf_v \inf_{\|\pi\|_1 \leq N} \sup_{x_i \in S} (x_i - v)^T \left( \sum_{a \in \mathcal{A}} \pi(a) a a^T \right)^\dagger (x_i - v) \leq 14 \frac{d}{N}$ . That is,  $\sup_{x_i, x_j \in S} (x_j - x_i)^T \left( \sum_{z \in \hat{\mathcal{Z}}} z z^T \right)^\dagger (x_j - x_i) \leq \tilde{d}$  and also  $\tilde{d} \leq d$ .*

*Proof.* Let

$$\mathcal{Z} = \underset{\substack{\mathcal{Z}' \subset \mathcal{A} \\ |\mathcal{Z}'| \leq N}}{\text{argmin}} \left\{ \sup_{x_i, x_j \in S} (x_j - x_i)^T \left( \sum_{z \in \mathcal{Z}'} z z^T \right)^\dagger (x_j - x_i) \right\} \quad (4)$$

Note that we consider  $\mathcal{Z}$  to be a set *with multiplicity* - it is permitted for an element to appear multiple times in  $\mathcal{Z}$ . Computing  $\mathcal{Z}$  exactly is NP-hard, but (Allen-Zhu et al., 2017) provides a way to approximate the solution. Note that equation 4 can be restated as follows:

$$c^* = \underset{c \in \{0, 1, 2, \dots, N\}^{|\mathcal{A}|}}{\text{argmin}} \left\{ \sup_{x_i, x_j \in S} (x_j - x_i)^T \left( \sum_{a \in \mathcal{A}} c(a) a a^T \right)^\dagger (x_j - x_i) \right\} \quad (5)$$

where  $c$  is treated as a vector in  $|\mathcal{A}|$  indexed by  $a \in \mathcal{A}$  and  $\mathcal{Z}$  is related to  $c^*$  as

$$\mathcal{Z} = \{a \in \mathcal{A} \text{ repeated } c^*(a) \text{ times}\}$$

Then, define the continuous relaxation of the objective in 5 as:

$$\pi^* = \operatorname{argmin}_{\substack{\|\pi\|_1 \leq N \\ \pi \in [0, N]^{|\mathcal{A}|}}} \left\{ \sup_{x_i, x_j \in S} (x_j - x_i)^T \left( \sum_{a \in \mathcal{A}} \pi(a) a a^T \right)^\dagger (x_j - x_i) \right\} \quad (6)$$

Section 3 from (Allen-Zhu et al., 2017) guarantees that a polynomial-time continuous optimization procedure can find a fractional solution  $\pi$  such that

$$\sup_{x_i, x_j \in S} (x_j - x_i)^T \left( \sum_{a \in \mathcal{A}} \pi(a) a a^T \right)^\dagger (x_j - x_i) \leq 7/6 \sup_{x_i, x_j \in S} (x_j - x_i)^T \left( \sum_{a \in \mathcal{A}} \pi^*(a) a a^T \right)^\dagger (x_j - x_i)$$

At the same time, Theorem 2.1 from (Allen-Zhu et al., 2017) (see Appendix C) provides a polynomial-time algorithm that rounds any fractional solution  $\pi$  to an integer solution  $c$  such that

$$\sup_{x_i, x_j \in S} (x_j - x_i)^T \left( \sum_{a \in \mathcal{A}} c(a) a a^T \right)^\dagger (x_j - x_i) \leq 3 \sup_{x_i, x_j \in S} (x_j - x_i)^T \left( \sum_{a \in \mathcal{A}} \pi(a) a a^T \right)^\dagger (x_j - x_i)$$

Combining the two equations, we get that there exists a polynomial-time algorithm that finds an integer solution  $c$  (or, equivalently, set  $\mathcal{Z}$ ) such that

$$\sup_{x_i, x_j \in S} (x_j - x_i)^T \left( \sum_{a \in \mathcal{A}} c(a) a a^T \right)^\dagger (x_j - x_i) \leq 7/2 \sup_{x_i, x_j \in S} (x_j - x_i)^T \left( \sum_{a \in \mathcal{A}} \pi^*(a) a a^T \right)^\dagger (x_j - x_i)$$

Now, notice that for any solution  $\pi$ , we have:

$$\begin{aligned} & \sup_{x_i, x_j \in S} (x_j - x_i)^T \left( \sum_{a \in \mathcal{A}} \pi(a) a a^T \right)^\dagger (x_j - x_i) \\ &= \inf_v \sup_{x_i, x_j \in S} (x_j - v + v x_i)^T \left( \sum_{a \in \mathcal{A}} \pi(a) a a^T \right)^\dagger (x_j - v + v x_i) \\ &\leq \inf_v \sup_{x_i, x_j \in S} (x_i - v)^T \left( \sum_{a \in \mathcal{A}} \pi(a) a a^T \right)^\dagger (x_i - v) + (x_j - v)^T \left( \sum_{a \in \mathcal{A}} \pi(a) a a^T \right)^\dagger (x_j - v) + 2(x_j - v)^T \left( \sum_{a \in \mathcal{A}} \pi^*(a) a a^T \right)^\dagger (x_i - v) \end{aligned}$$

Now, observe that  $a^T M b = \langle \sqrt{M} a, \sqrt{M} b \rangle \leq \frac{a^T M a}{2} + \frac{b^T M b}{2}$  for any positive-semidefinite matrix  $M$  by Young inequality. Therefore:

$$\begin{aligned} \sup_{x_i, x_j \in S} (x_j - x_i)^T \left( \sum_{a \in \mathcal{A}} \pi^*(a) a a^T \right)^\dagger (x_j - x_i) &\leq 4 \inf_v \inf_{\substack{\|\pi\|_1 \leq N \\ \pi \in [0, N]^{|\mathcal{A}|}}} \sup_{x \in S} (x - v)^T \left( \sum_{a \in \mathcal{A}} \pi(a) a a^T \right)^\dagger (x - v) \\ &\leq \frac{4}{N} \inf_v \inf_{\substack{\|\pi\|_1 \leq 1 \\ \pi \in [0, N]^{|\mathcal{A}|}}} \sup_{x \in S} (x - v)^T \left( \sum_{a \in \mathcal{A}} \pi(a) a a^T \right)^\dagger (x - v) \\ &\leq 4 \frac{d}{N} \end{aligned}$$

where the last line follows from setting  $v = 0$  and applying the Kiefer-Wolfowitz theorem (Kiefer & Wolfowitz, 1960).

Thus, combining everything, we get that

$$\begin{aligned} & \sup_{x_i, x_j \in S} (x_j - x_i)^T \left( \sum_{a \in \mathcal{A}} c(a) a a^T \right)^\dagger (x_j - x_i) \leq \\ & 7/2 \sup_{x_i, x_j \in S} (x_j - x_i)^T \left( \sum_{a \in \mathcal{A}} \pi^*(a) a a^T \right)^\dagger (x_j - x_i) \leq \\ & \frac{14}{N} \inf_v \inf_{\substack{\|\pi\|_1 \leq 1 \\ \pi \in [0, N]^{|\mathcal{A}|}}} \sup_{x \in S} (x - v)^T \left( \sum_{a \in \mathcal{A}} \pi(a) a a^T \right)^\dagger (x - v) \leq \\ & 14 \frac{d}{N} \end{aligned}$$

□

Lemma 11 depends only on the budget  $N$  and the number of dimensions  $d$ . Notice that the bound does not depend on distribution of the arms.

**Lemma 12.** *Given the objective  $f_S$ , the set  $\mathcal{A}$ , and a number  $N \geq |S|$ , the output  $\mathcal{Z}$  of `GetArms` satisfies  $|\mathcal{Z}| \leq N$  and  $\sup_{x_i, x_j \in S} (x_j - x_i)^T (\sum_{z \in \mathcal{Z}} z z^T)^\dagger (x_j - x_i) \leq 2 \frac{|S|}{N}$ .*

*Proof.* By Lemma 14, for any  $x_i, x_j \in S$ ,

$$(x_j - x_i)^T \left( \sum_{x \in S} x x^T \right)^\dagger (x_j - x_i) \leq 2$$

So, letting  $\tilde{\mathcal{Z}} \leftarrow \{s \in S \text{ repeated } \frac{N}{|S|} \text{ times}\}$

$$\begin{aligned} & \sup_{x_i, x_j \in S} (x_j - x_i)^T \left( \sum_{z \in \tilde{\mathcal{Z}}} z z^T \right)^\dagger (x_j - x_i) \\ & \leq \frac{|S|}{N} \sup_{x_i, x_j \in S} (x_j - x_i)^T \left( \sum_{x \in S} x x^T \right)^\dagger (x_j - x_i) \\ & \leq 2 \frac{|S|}{N} \end{aligned}$$

□

While the above Lemma requires the number of pulls to be greater than the candidate set  $S$ , the next Lemma shows that it is possible to bound the performance of `OptDesign` even if  $N < |S|$ .

**Lemma 13.** *Given the objective  $f_S$ , the set  $\mathcal{A}$ , and a number  $N$ , the output  $\mathcal{Z}$  of `GetArms` satisfies  $|\mathcal{Z}| \leq N$  and  $\sup_{x_i, x_j \in S} (x_j - x_i)^T (\sum_{z \in \mathcal{Z}} z z^T)^\dagger (x_j - x_i) \leq 6 \frac{|S|}{N}$ .*

*Proof.* Given any fractional solution to  $f_S$   $\pi$ , using Theorem 2.1 from (Allen-Zhu et al., 2017), `OptDesign` outputs an integer solution  $\mathcal{Z}$  such that

$$\begin{aligned} & \sup_{x_i, x_j \in S} (x_j - x_i)^T \left( \sum_{z \in \mathcal{Z}} z z^T \right)^\dagger (x_j - x_i) \leq \\ & 3 \sup_{x_i, x_j \in \mathcal{Z}} (x_j - x_i)^T \left( \sum_{z \in \mathcal{Z}} \pi_z z z^T \right)^\dagger (x_j - x_i) \leq \\ & 3 \sup_{z_i, z_j \in \mathcal{Z}} (x_j - x_i)^T \left( \sum_{z \in S} \frac{N}{|S|} z z^T \right)^\dagger (x_j - x_i) \leq \\ & 3 \frac{|S|}{N} \sup_{x_i, x_j \in S} (x_j - x_i)^T \left( \sum_{z \in S} z z^T \right)^\dagger (x_j - x_i) \leq 6 \frac{|S|}{N} \end{aligned}$$

where the last step uses Lemma 14 below. □

Now we prove Lemma 14:

**Lemma 14.** *Let  $x_1, \dots, x_n$  be arbitrary vectors in  $\mathbb{R}^d$ . Let  $X$  be a matrix s.t.  $i$ th row of  $X$  corresponds to  $x_i$  for all  $i$ . Then for any  $j, k$ ,*

$$(x_j - x_k)^T (X^T X)^\dagger (x_j - x_k) \leq 2$$

*Proof.* For any  $j$ ,  $x_j = X^T e_j$  where  $e_j$  is the  $j$ th identity vector. Then for any  $j, k$ ,

$$\begin{aligned} & (x_j - x_k)^T (X^T X)^\dagger (x_j - x_k) = \\ & (e_j - e_k)^T X (X^T X)^\dagger X^T (e_j - e_k) \end{aligned}$$

Let  $e = e_j - e_k$ , and let  $u = (X^T X)^\dagger X^T e$ . Then,

$$\begin{aligned} X^T X u &= X^T e \implies X^T (X u - e) = 0 \implies \\ X u - e &\in \ker(X^T) \implies X u - e \perp \text{Im}(X) \end{aligned}$$

Then there exists a  $w$  such that  $e = X u + Q w$ , where  $Q$  is a matrix with columns orthogonal to columns of  $X$ . Then,

$$e^T X (X^T X)^\dagger X^T e = u^T X^T X (X^T X)^\dagger X^T X u$$

By definition of  $u$ ,  $u \perp \ker(X^T X)$ , and thus

$$\begin{aligned} (x_j - x_k)^T (X^T X)^\dagger (x_j - x_k) &= \\ u^T X^T X (X^T X)^\dagger X^T X u &= \\ u^T X^T X u = \|X u\|_2^2 &\leq \|e\|_2^2 = 2 \end{aligned}$$

because  $\|e\|_2^2 = \|X u\|_2^2 + \|Q w\|_2^2$  □

Given the above, we are ready to proof Theorem 5.

*Proof of Theorem 5.* Combining Lemmas 11, 12, and 13, we get that on inputs  $S$ ,  $N$  and  $\mathcal{A}$ , `GetArms` produces a set  $\mathcal{Z}$  such that if  $\frac{T}{\lceil \log_2 n \rceil} = N \geq |S|$ , `GetArms` returns a set  $\mathcal{Z}$  that satisfies:

$$\sup_{x_i, x_j \in S} (x_j - x_i)^T \left( \sum_{z \in \mathcal{Z}} z z^T \right)^\dagger (x_j - x_i) \leq \min \left\{ \frac{8|S|/4}{N}, \frac{14\tilde{d}}{N} \right\} = 8 \frac{h_{|S|/4}}{N}$$

Similarly, if  $N < |S|$ , `GetArms` returns a set  $\mathcal{Z}$  that satisfies:

$$\sup_{x_i, x_j \in S} (x_j - x_i)^T \left( \sum_{z \in \mathcal{Z}} z z^T \right)^\dagger (x_j - x_i) \leq \min \left\{ 14 \frac{\tilde{d}}{N}, 24 \frac{|S|/4}{N} \right\} = 8 \frac{h_{|S|/4}}{N}$$

□

## C. Properties of the Objective $f_S$

In this section we verify that the assumptions required to use the approach of (Allen-Zhu et al., 2017) in `GetArms` hold.

### C.1. Equivalence of objectives

**Lemma 15.** Assume we are given a set of  $n$  vectors  $\mathcal{Z} \subset \mathbb{R}^d$  that span a  $k$ -dimensional subspace. Let  $Z \in \mathbb{R}^{n \times d}$  be a matrix such that each row represents a vector in  $\mathcal{Z}$ . Let  $Q \in \mathbb{R}^{k \times d}$  be a matrix with orthogonal rows such that  $\text{span}(Q^T) = \text{span}(Z^T)$ . Define  $M = (Q Q^T)^{-1/2} Q$ . Then, for any symmetric, positive semi-definite matrix  $A \in \mathbb{R}^{d \times d}$  such that  $A^\dagger z < \infty$  for all  $z \in \mathcal{Z}$ , it holds that  $M A M^T$  is invertible and for all  $z \in \mathcal{Z}$

$$(M z)^T (M A M^T)^{-1} M z = z^T A^\dagger z$$

*Proof.*

$$M A M^T = (Q Q^T)^{-1/2} Q A Q^T (Q Q^T)^{-1/2}$$

Since  $A$  is a symmetric PSD matrix, it has a symmetric PSD root  $A^{1/2}$ . Since  $(Q Q^T)^{-1/2}$  is invertible,  $A^{1/2} Q^T (Q Q^T)^{-1/2}$  has rank less than  $k$  iff there exists  $v \neq 0$ ,

$$A^{1/2} Q^T v = A^{1/2} \left( \sum_{i=1}^k v_i q_i \right) = 0$$

where  $q_i$  correspond to rows of  $Q$ . By assumption, for each  $z_i \in \mathcal{Z}$ , there exists  $y_i$  s.t.  $Ay_i = A^{1/2}A^{1/2}y_i = z_i$ . Thus,  $z_i \in \text{Im}(A^{1/2})$  for all  $i$ . Since  $\text{span}(Z^T) = \text{span}(Q^T)$ , it must be that  $\sum_{i=1}^k v_i q_i \in \text{Im}(A^{1/2})$ . Since the kernel of  $A^{1/2}$  is orthogonal to the image of  $A^{1/2}$ , we get that  $A^{1/2}(\sum_{i=1}^k v_i q_i) = 0$  iff  $\sum_{i=1}^k v_i q_i = 0$ , which is impossible, since  $q_i$  form an orthogonal set.

Thus,  $B = A^{1/2}Q^T(QQ^T)^{-1/2}$  has rank  $k$ , and thus  $MAM^T = B^T B \in \mathbb{R}^{k \times k}$  is invertible.

Moreover, note that if  $\mathcal{Z}$  is not in the image of  $A$ , then  $MAM^T$  is not invertible.

For the second part of the Lemma, fix some  $z \in \mathcal{Z}$ . By assumption, there exists  $y \in \mathbb{R}^d$  s.t.  $A^\dagger z = y$ , which implies that  $Ay = z$  and  $y$  is orthogonal to  $\ker(A)$ . Since  $A$  is a symmetric PSD matrix, this means that  $y \in \text{Im}(A)$ . Let  $Q_1 \in \mathbb{R}^{k_1 \times d}$  be an orthogonal row matrix s.t. the rows of  $Q$  and  $Q_1$  together span  $\text{Im}(A)$  and rows of  $Q$  and  $Q_1$  are orthogonal to each other. Notice that that implies that  $A = [Q^T | Q_1^T] \Lambda [Q^T | Q_1^T]^T$  where  $\Lambda$  is diagonal. Then,  $y = Q^T w + Q_1^T w_1$  for some  $w, w_1$ . Then substituting the definition of  $M$  and using the fact that  $Ay = z$ ,

$$\begin{aligned} (Mz)^T (MAM^T)^{-1} Mz &= z^T Q^T (QAQ^T)^{-1} QAy = \\ &= z^T Q^T (QAQ^T)^{-1} QA(Q^T w + Q_1^T w_1) = \\ &= z^T Q^T w + z^T Q^T (QAQ^T)^{-1} QAQ_1^T w_1 \end{aligned}$$

Then,

$$\begin{aligned} QAQ_1^T &= Q[Q^T | Q_1^T] \Lambda [Q^T | Q_1^T]^T Q_1^T = \\ &= [I_{k \times k} | \mathbf{0}_{k \times k_1}] \Lambda [\mathbf{0}_{k_1 \times k}^T | I_{k_1 \times k_1}]^T = \mathbf{0} \end{aligned}$$

Thus, the equation above becomes

$$(Mz)^T (MAM^T)^{-1} Mz = z^T Q^T w$$

Since columns in  $Q_1$  are orthogonal to columns of  $z$ ,

$$\begin{aligned} z^T A^\dagger z &= z^T y = z^T Q^T w = \\ &= (Mz)^T (MAM^T)^{-1} Mz \end{aligned}$$

□

Using the above, given a set of arms  $\mathcal{A} \subset \mathbb{R}^d$  and a set  $\mathcal{Z} \subset \mathbb{R}^d$ , define  $M$  as in Lemma 15. Then for any subset  $\mathcal{A}' \subset \mathcal{A}$ ,

$$\begin{aligned} \sup_{z \in \mathcal{Z}} (Mz)^T \left( \sum_{x \in \mathcal{A}'} Mx(Mx)^T \right)^{-1} Mz &= \\ \sup_{z \in \mathcal{Z}} z^T \left( \sum_{x \in \mathcal{A}'} xx^T \right)^\dagger z & \end{aligned}$$

where we use

$$(Mz)^T \left( \sum_{x \in \mathcal{A}'} Mx(Mx)^T \right)^{-1} Mz = \infty$$

if  $\sum_{x \in \mathcal{A}'} Mx(Mx)^T$  is not invertible. Notice that if  $\mathcal{Z} = \{z_i - z_j | z_i, z_j \in \mathcal{S}\}$  for some set of arms  $\mathcal{S}$ , and  $\mathcal{S} \subset \text{span}(\mathcal{A})$ , then  $\mathcal{Z}$  is in the image of  $\sum_{x \in \mathcal{A}} xx^T$ .

Thus, if we are give a number  $N$ , sets  $\mathcal{Z}, \mathcal{A}$ , then

$$\begin{aligned} \operatorname{argmin}_{\substack{\mathcal{X} \subset \mathcal{A} \\ |\mathcal{A}| \leq N}} f_{\mathcal{Z}}(\mathcal{X}) &= \\ \operatorname{argmin}_{\substack{\mathcal{X} \subset \mathcal{A} \\ |\mathcal{A}| \leq N}} \sup_{z \in \mathcal{Z}} z^T \left( \sum_{x \in \mathcal{X}} xx^T \right)^\dagger z &= \\ \operatorname{argmin}_{\substack{\mathcal{X} \subset \mathcal{A} \\ |\mathcal{A}| \leq N}} \sup_{z \in \mathcal{Z}} (Mz)^T \left( \sum_{x \in \mathcal{X}} Mx(Mx)^T \right)^{-1} Mz & \end{aligned}$$

The algorithm `GetArms` ensures that  $\mathcal{Z} \subset \mathcal{A}$ , and  $N \geq \dim(\text{span}(\mathcal{Z}))$  whenever it attempts to find a solution to

$$\underset{\substack{\mathcal{X} \subset \mathcal{A} \\ |\mathcal{A}| \leq N}}{\text{argmin}} f_{\mathcal{Z}}(\mathcal{X})$$

Thus, every time the minimization algorithm for the above objective is called, there exists a subset  $\mathcal{X}$  that makes  $f_{\mathcal{Z}}$  finite. Moreover,  $\sum_{x \in \mathcal{X}} Mx(Mx)^T$  is invertible.

Using this, we can now replace the minimization objective with

$$\underset{\substack{\tilde{\mathcal{X}} \subset \tilde{\mathcal{A}} \\ |\tilde{\mathcal{A}}| \leq N}}{\text{argmin}} \sup_{z \in \tilde{\mathcal{Z}}} z^T \left( \sum_{x \in \tilde{\mathcal{X}}} xx^T \right)^{-1} z$$

where  $\tilde{\mathcal{A}} = M\mathcal{A}$  and  $\tilde{\mathcal{Z}} = M\mathcal{Z}$ . Notice that then, the solution to the objective  $\tilde{\mathcal{X}}$  forms an invertible matrix  $\sum_{x \in \tilde{\mathcal{X}}} xx^T$ . Thus, to find an approximate solution, we can use the procedure in (Allen-Zhu et al., 2017) that finds an approximate solution over the space of positive-definite matrices. Moreover, if  $\mathcal{Z} \subset \mathbb{R}^d$  span  $\mathbb{R}^d$ , then  $M = I$  and the two objective are exactly the same.

## C.2. Solution over the set of positive-definite matrices

By the discussion in the previous section, we can assume that the objective optimized in `GetArms` has the following form:

Given a set of arms  $\mathcal{A} \subset \mathbb{R}^k$  that span  $\mathbb{R}^k$ , a subset  $Z \in \mathcal{A}$  and number of pulls per round  $N$ ,

$$f(M) = \sup_{\substack{z = z_i - z_j \\ z_i, z_j \in \mathcal{A}}} z^T M^{-1} z$$

Below, we will show that  $f$  satisfies the conditions required by the approximation algorithm (Allen-Zhu et al., 2017) hold.

$f$  satisfies the following assumptions (see (Allen-Zhu et al., 2017)):

- (A1) Monotonicity: for any  $A, B \in \mathbb{S}_d^+$  with  $A \preceq B$ ,  $f(A) \geq f(B)$
- (A2) Reciprocal sub-linearity: for any  $A \in \mathbb{S}_d^+$  and  $t \in (0, 1)$ ,  $f(tA) \leq t^{-1}f(A)$
- (A3) Polynomial-time approximability of continuous relaxation: for any fixed  $\delta \in (0, 1)$ , the continuous relaxation of 4 defined as

$$\min_{s \in C} F(s) = \min_{s \in C} f\left(\sum_{i=1}^{Nn} s_i x_i x_i^T\right) \text{ where}$$

$$C = \left\{s \in [0, N]^{Nn} : \sum_{i=1}^{Nn} s_i \leq N\right\}$$

can be solved with  $(1 + \delta)$ -relative error by a polynomial-time algorithm.

Assumptions (A1) and (A2) trivially hold. As for assumption (A3), notice that

**Theorem 16.**  $f$  is a convex function in  $s$  over a convex set  $C$ .

*Proof.* Given any  $s_1, s_2 \in C$  and  $t \in [0, 1]$ ,

$$\left( t \sum_{i=1}^{Nn} s_{1,i} x_i x_i^T + (1-t) \sum_{i=1}^{Nn} s_{2,i} x_i x_i^T \right)^{-1} \preceq$$

$$t \left( \sum_{i=1}^{Nn} s_{1,i} x_i x_i^T \right)^{-1} + (1-t) \left( \sum_{i=1}^{Nn} s_{2,i} x_i x_i^T \right)^{-1}$$

Let

$$z = \operatorname{argmax}_{\substack{z = z_i - z_j \\ z_i, z_j \in Z}} z^T \left( t \sum_{i=1}^{Nn} s_{1,i} x_i x_i^T + (1-t) \sum_{i=1}^{Nn} s_{2,i} x_i x_i^T \right) z$$

Then, using (A1),

$$\begin{aligned} F(ts_1 + (1-t)s_2) &= \\ z^T \left( t \sum_{i=1}^n s_{1,i} x_i x_i^T + (1-t) \sum_{i=1}^n s_{2,i} x_i x_i^T \right) z &\leq \\ tz^T \left( \sum_{i=1}^n s_{1,i} x_i x_i^T \right)^{-1} z + (1-t) z^T \left( \sum_{i=1}^n s_{2,i} x_i x_i^T \right)^{-1} z &\leq \\ tF(s_1) + (1-t)F(s_2) \end{aligned}$$

□

Thus, since  $F(s)$  is convex, there are a number of convex solvers that minimize  $F$  over  $C$  in polynomial time. For completeness, we also show that entropic mirror descent method from (Allen-Zhu et al., 2017) can be used to optimize  $F$ : Assumptions B1 and B3 are trivially satisfied, while for B2,  $F_\lambda$  is Lipschitz because it is convex.

Then, notice that equation (4) can be restated as follows: let  $\{x_1, x_2, \dots, x_{N \times n}\}$  be a set of arms such that each of the  $n$  arms in  $\mathcal{A}$  is replicated exactly  $N$  times. Then, minimizing (4) is equivalent to

$$\begin{aligned} \operatorname{argmin}_{s \in S} F(s) &= \operatorname{argmin}_{s \in S} f\left(\sum_{i=1}^{Nn} s_i x_i x_i^T\right) \text{ where} \\ S &= \{s \in \{0, 1, \dots, N\}^{Nn} : \sum_{i=1}^{Nn} s_i \leq N\} \end{aligned}$$

Thus, using Theorem 2.1 from (Allen-Zhu et al., 2017) (stated below, using our notation) and assuming  $T \geq 45d \log_2 n$ , we get that

**Theorem 17.** *Suppose  $\varepsilon \in (0, 1/3]$ ,  $Nn \geq N \geq 5d/\varepsilon^2$ ,  $b \in \{1, 2, \dots, N\}$ , and  $f : S_d^+ \rightarrow \mathbb{R}$  satisfies assumptions (A1) and (A2). Let  $\pi \in C$  by any fractional solution so that  $F(\pi) < \infty$ . Then, in time complexity  $\tilde{O}(Nnd^2)$  we can round  $\pi$  to an integral solution*

$$\hat{s} \in S \text{ satisfying } F(\hat{s}) \leq (1 + 6\varepsilon)F(\pi)$$

where  $C = \{c \in [0, N]^{Nn} : \sum_{i=1}^{Nn} c_i \leq N\}$ .

For completion, we also note that our algorithm is almost optimal, which follows from Theorem 1.4 from (Allen-Zhu et al., 2017):

**Theorem 18.** *Suppose  $\varepsilon \in (0, 1/3]$ ,  $Nn \geq N \geq 5d/\varepsilon^2$ ,  $f : S_d^+ \rightarrow \mathbb{R}$  satisfies assumptions (A1)-(A3), and  $\min_{s \in S} F(s) < +\infty$ . Then, there exist a polynomial-time algorithm that outputs  $\hat{s} \in S$  satisfying*

$$F(\hat{s}) \leq (1 + 8\varepsilon) \min_{s \in S} F(s)$$

Thus, under assumption that  $T > 45d \log_2 n$ , using  $N = \frac{T}{\log_2 n} \geq 45d$ , we get that there exists an  $\varepsilon \in (0, 1/3]$  s.t.  $N\varepsilon^2 \geq 5d$  and so the hypotheses of Theorem 18 are satisfied. In particular, we have the following result:

**Theorem 19.** *If  $T > 45d \log_2(n)$ , then in `GetArms`, the output  $\hat{\mathcal{X}}$  provided by the algorithm of (Allen-Zhu et al., 2017) satisfies:*

$$f_S(\hat{\mathcal{X}}) \leq \frac{11}{3} \inf_{|\mathcal{X}|=N} f_S(\mathcal{X})$$

## D. Proof of Theorem 6

**Theorem 6.** *Given a  $d$ -dimensional linear bandit pure-exploration algorithm, any  $p \in (0, 1/2)$ , and any  $n \geq d$ , there exists an problem instance on which the probability of identifying the best arm is at most  $1 - \exp\left(\frac{-(15+o(1))T}{p(1-p)\bar{H}_2}\right)$ , where the  $o(1)$  depends on  $n, T$  and  $p$  and goes to zero as  $T \rightarrow \infty$ .*

*Proof.* Suppose otherwise. Then given any  $d$ -armed multi-armed bandit problem with true rewards  $y_1, \dots, y_d$  contained in  $[p, 1-p]$ , we construct an  $d+1$ -dimensional linear bandit problem as follows: choose an arbitrary orthonormal set  $z_1, \dots, z_d \subset \mathbb{R}^{d+1}$ . Set  $\theta = \sum_{i=1}^d y_i z_i$ . For  $i > d$ , set  $x_i = z_i$  where now  $r_i$  is an arbitrary value in  $[0, p]$ , and  $z_i$  is an arbitrary vector such that  $\langle z - i, z_j \rangle = 0$  for all  $i \leq d$ . When our algorithm queries arm  $x_i$  for  $i \leq d$ , we provide an observed Bernoulli reward with mean  $\langle x_i, \theta \rangle = y_i$ , and for  $i > d$ , we provide  $\langle x_i, \theta \rangle < p$ . Then finding the best arm in this setting is equivalent to finding the best arm in the original multi-armed bandit problem. The value  $H_2$  in the multi-armed bandit instance is  $\max_{i \leq d} i \Delta_i^{-2} \geq \frac{1}{3} \bar{H}_2$ , and so the Theorem follows from (Audibert & Bubeck, 2010a) Theorem 4.  $\square$

## E. Proof of Theorem 7

**Theorem 7.** *Given a linear bandit pure-exploration algorithm, there exists a problem instance on which the probability of identifying the best arm is at most  $1 - \exp(-T \cdot (1/\sqrt{H_{LB}} + 2 \sin \frac{\pi}{n}))^2$ .*

We will use the following construction. Consider a problem instance with set  $A$  of  $n$  arms  $x_1, x_2, \dots, x_n$  that are equispaced on the unit circle  $S^1 \subset \mathbb{R}^2$  (the construction can be extended to higher dimensions). The angle between every consecutive pair of arms is therefore  $\frac{2\pi}{n}$ . Let  $\theta$  have unit norm and be aligned along  $x_1$ . Consider the set of parameter vectors  $M$  that are exactly aligned along one of the arms, i.e.  $M := \{x_1, x_2, \dots, x_n\}$ . By rotational invariance, for any parameter vector  $\lambda \in M$ , the problem instances will have exactly the same value of  $H_{LB}$ . Now, we can use the same construction as in the proof of Theorem 1 from (Degenne et al., 2020), but with the added assumption that the strategy  $\psi$  has knowledge of the  $H_{LB}$  value for the two problem instances, to show the following:

**Lemma 20.** *For any linear-bandit fixed budget algorithm running for time  $T$  and achieving error probability  $\delta$ , for all  $\theta \in M$ , we have*

$$\frac{T}{\log_2(1/\delta)} \geq \frac{1}{\max_{w \in D_d} \min_{\lambda \in M, \lambda \in -\theta} \|\theta - \lambda\|_{V_w}^2},$$

where  $-\theta$  refers to the set  $\{\lambda : \max_{a \in A} \lambda^T a > \max_{a \in A} \theta^T a\}$

*Proof.* Suppose there exists a linear bandit fixed-budget algorithm for which the above bound is not true. We will use such an algorithm. along with the value of  $H_{LB}$  from the construction to create a fixed-confidence strategy  $\psi$  to distinguish between two problem instances with parameter vector  $\theta, \lambda \in M$ , as described in the proof of Theorem 1 of (Degenne et al., 2020), from which the lemma follows.  $\square$

We can further show the following lemma, that relates  $\min_{\lambda \in M, \lambda \in -\theta} \|\theta - \lambda\|^2$

**Lemma 21.** *For a fixed  $w$  and  $\theta$ , we have*

$$\min_{\lambda \in M, \lambda \in -\theta} \|\theta - \lambda\|_{V_w} < \min_{\lambda \in S^1, \lambda \in -\theta} \|\theta - \lambda\|_{V_w} + 2 \sin \frac{\pi}{n}$$

*Proof.* Let  $\lambda^*$  be the minimizer of  $\min_{\lambda \in S^1, \lambda \in -\theta} \|\theta - \lambda\|_{V_w}$ . By definition of  $M$ , there exists a  $\lambda' \in M$  such that  $\|\lambda' - \lambda^*\|_{V_w} \leq \|\lambda' - \lambda^*\|_2 \|V_w\|_2 = 2 \sin \frac{\pi}{n} \|V_w\|_2 \leq 2 \sin \frac{\pi}{n}$ . The last inequality is true since  $\|V_w\|_2 = \|\sum_{i=1}^d w_i x_i x_i^T\|_2 \leq \sum_{i=1}^d w_i \|x_i x_i^T\| = 1$ , since the  $w_i$  lie on a simplex and  $x_i$  lie on the unit circle.  $\square$

Using the above two lemmas, we have

$$\begin{aligned}
 \frac{T}{\log_2(1/\delta)} &\geq \frac{1}{\max_{w \in D_d} \min_{\lambda \in M, \lambda \in -\theta} \|\theta - \lambda\|_{V_w}^2} \\
 &= \frac{1}{\max_{w \in D_d} (\min_{\lambda \in M, \lambda \in -\theta} \|\theta - \lambda\|_{V_w})^2} \\
 &\geq \frac{1}{\max_{w \in D_d} (\min_{\lambda \in S^1, \lambda \in -\theta} \|\theta - \lambda\|_{V_w} + 2 \sin \frac{\pi}{n})^2} \\
 &\geq \frac{1}{\left(\frac{1}{\sqrt{H_{LB}}} + 2 \sin \frac{\pi}{n}\right)^2}
 \end{aligned}$$

where the last inequality follows from Lemma 8 of (Degenne et al., 2020). The theorem follows.

## F. Proofs for Section 6

**Lemma 8.** *The probability that  $y_{1,m+1} < y_{1,m} - \epsilon$  is at most:*

$$3 \exp\left(-\frac{\max\{(\epsilon - (2 + \sqrt{2h_{|S_m|/4})\gamma_{\max})^2, 0\}T}{\log_2(n)h_{|S_m|/4}}\right)$$

*Proof.* Define  $\Delta_{i,m} \leq \Delta_i$  to be the gap between the  $i$ th best arm and the best arm remaining in  $S_m$ . Then notice that the result of Lemma 3 still holds if we replace  $x_1$  with the best arm remaining in  $S_m$  and  $\Delta_i$  with  $\Delta_{i,m}$

Let  $S_m^\epsilon$  be the set of arms in  $S_m$  with  $y$  value less than  $y_{1,m} - \epsilon$ . Notice that in order for  $y_{1,m+1}$  to be less than  $y_{1,m} - \epsilon$ , we must have  $|S_m|/2$  elements of  $|S_m^\epsilon|$  to have  $\hat{y}$  values larger than those of the best arm left in  $S_m$ . Let  $S_m^{\epsilon'}$  be the set of arms that excludes the  $\frac{1}{4}|S_m|$  arms with highest true mean from  $S_m^\epsilon$ . Then if  $y_{1,m+1} < y_{1,m}$ , we must have  $\frac{1}{3}$  of the arms in  $S_m^{\epsilon'}$  have higher  $\hat{y}$  estimates than the best arm in  $S_m$ . Let  $N_m$  be the number of such arms. Define  $D = \max\{(\epsilon - (2 + \sqrt{h_{|S_m|/4})\gamma_{\max})^2, 0\}$ .

Then, since all arms in  $S_m^\epsilon$  have  $\Delta_{i,m} \geq \epsilon$ , we have by Lemma 3 that

$$\mathbb{E}[N_m] \leq |S_m^{\epsilon'}| \exp\left(-\frac{DT}{\log_2(n)h_{|S_m|/4}}\right)$$

So using Markov inequality in exactly the same way as in the proof of Lemma 3, the conclusion follows.  $\square$
